# Supplementary material for: Chronic hepatitis B virus case-finding in UK populations born abroad in intermediate or high endemicity countries: an economic evaluation
Source: PubMed Central journal article supplement (PMC6609059; doi:10.1136/bmjopen-2019-030183), 2019-06-28
Supplement: bmjopen-2019-030183supp001.pdf [file bmjopen-2019-030183supp001.pdf]

## Supplementary Materials

**Supplementary Table 1: Annual transition probability matrix for people who enter the model as HBsAg+ and HBeAg+ derived from Shepherd(1) and Marcellin(2)**

| From:                                        | To: | HBsAg seroconverted | HBeAg seroconverted | CHB HBeAg+ active disease | CC   | DC   | HCC     | LT1  | LT2 | Dead <sup>+</sup> |
|----------------------------------------------|-----|---------------------|---------------------|---------------------------|------|------|---------|------|-----|-------------------|
| HBsAg seroconverted                          |     | #                   | 0                   | 0                         | 0    | 0    | 0.00005 | 0    | 0   | 0                 |
| HBeAg seroconverted                          |     | 0.02                | #                   | 0.03                      | 0.01 | 0    | 0.005   | 0    | 0   | 0                 |
| CHB HBeAg+ active disease no treatment       |     | 0.0175              | 0.05                | #                         | 0.05 | 0    | 0.005   | 0    | 0   | 0.0035            |
| CHB HBeAg+ active disease or CC on treatment |     |                     |                     |                           |      |      |         |      |     |                   |
| Treatment response with peglyated interferon |     | 0.0175              | 0.20                | #                         | 0.05 | 0    | 0.005   | 0    | 0   | 0.0035            |
| Treatment response with tenofovir            |     | 0.0175              | 0.054               | #                         | 0.05 | 0    | 0.005   | 0    | 0   | 0.0035            |
| Compensated cirrhosis (CC) no treatment      |     | 0                   | 0.05                | 0                         | #    | 0.05 | 0.025   | 0    | 0   | 0.051             |
| Decompensated cirrhosis (DC)                 |     | 0                   | 0                   | 0                         | 0    | #    | 0.025   | 0.03 | 0   | 0.39              |
| Hepatocellular carcinoma (HCC)               |     | 0                   | 0                   | 0                         | 0    | 0    | #       | 0    | 0   | 0.56              |
| Liver transplant – first year (LT1)          |     | 0                   | 0                   | 0                         | 0    | 0    | 0       | #    | 0   | 0.21              |
| Liver transplant – subsequent years (LT2)    |     | 0                   | 0                   | 0                         | 0    | 0    | 0       | 0    | #   | 0.057             |

<sup>+</sup>an age-adjusted general population mortality is added to this amount; #, indicates the residual row probability; all values are converted to a Dirichlet distribution by assuming an effective sample size of 200 for each row(3)

**Supplementary Table 2: Annual transition probability matrix for people who enter the model as HBsAg+ and HBeAg-derived from Shepherd(1) and Marcellin(2)**

| <b>From:</b>                                        | <b>To:</b> | <b>HBsAg seroconverted</b> | <b>HBeAg seroconverted</b> | <b>CHB HBeAg- active disease</b> | <b>CC</b> | <b>DC</b> | <b>HCC</b> | <b>LT1</b> | <b>LT2</b> | <b>Dead<sup>†</sup></b> |
|-----------------------------------------------------|------------|----------------------------|----------------------------|----------------------------------|-----------|-----------|------------|------------|------------|-------------------------|
| <b>HBsAg seroconverted</b>                          |            | #                          | 0                          | 0                                | 0         | 0         | 0.00005    | 0          | 0          | 0                       |
| <b>HBeAg seroconverted</b>                          |            | 0.0175                     | #                          | 0.03                             | 0.01      | 0         | 0.005      | 0          | 0          | 0                       |
| <b>CHB HBeA- active disease no treatment</b>        |            | 0                          | 0.015                      | #                                | 0.05      | 0         | 0.005      | 0          | 0          | 0.0035                  |
| <b>CHB HBeAg- active disease or CC on treatment</b> |            |                            |                            |                                  |           |           |            |            |            |                         |
| <b>Treatment response with peglyated interferon</b> |            | 0                          | 0.75                       | #                                | 0.05      | 0         | 0.005      | 0          | 0          | 0.0035                  |
| <b>Treatment response with tenofovir</b>            |            | 0                          | 0.023                      | #                                | 0.05      | 0         | 0.005      | 0          | 0          | 0.0035                  |
| <b>Decompensated cirrhosis (DC)</b>                 |            | 0                          | 0                          | 0                                | 0         | #         | 0.025      | 0.03       | 0          | 0.39                    |
| <b>Hepatocellular carcinoma (HCC)</b>               |            | 0                          | 0                          | 0                                | 0         | 0         | #          | 0          | 0          | 0.56                    |
| <b>Liver transplant – first year (LT1)</b>          |            | 0                          | 0                          | 0                                | 0         | 0         | 0          | #          | 0          | 0.21                    |
| <b>Liver transplant – subsequent years (LT2)</b>    |            | 0                          | 0                          | 0                                | 0         | 0         | 0          | 0          | #          | 0.057                   |

<sup>†</sup>an age-adjusted general population mortality is added to this amount; #, indicates the residual row probability; all values are converted to a Dirichlet distribution by assuming an effective sample size of 200 for each row(3)

**Supplementary Table 3: Utility values from Shepherd(1) and Takeda(4)**

| <b>Utility</b>                                   | <b>Mean decrement</b> | <b>95% interval of sampled range<sup>^</sup></b> |
|--------------------------------------------------|-----------------------|--------------------------------------------------|
| <b>Age</b>                                       |                       |                                                  |
| <b>0-44</b>                                      | 0.09                  | -                                                |
| <b>45-54</b>                                     | 0.15                  | -                                                |
| <b>55-64</b>                                     | 0.20                  | -                                                |
| <b>65-74</b>                                     | 0.22                  | -                                                |
| <b>75+</b>                                       | 0.27                  | -                                                |
| <b>HBsAg-</b>                                    | 0                     | -                                                |
| <b>HBeAg+ seroconverted / HBeAg- ALT/DNA low</b> | 0                     | -                                                |
| <b>HBeAg+ / HBeAg- active disease</b>            | 0.04                  | 0.023-0.062                                      |
| <b>Compensated cirrhosis</b>                     | 0.44                  | 0.34-0.55                                        |
| <b>Decompensated cirrhosis</b>                   | 0.54                  | 0.43-0.73                                        |
| <b>Hepatocellular carcinoma</b>                  | 0.54                  | 0.43-0.73                                        |
| <b>Liver transplant (first year)</b>             | 0.54                  | 0.43-0.73                                        |
| <b>Liver transplant (subsequent years)</b>       | 0.32                  | 0.22-0.43                                        |

Utility values are calculated by subtracting appropriate decrements from 1; <sup>^</sup>Sampled values from the probabilistic sensitivity analysis using a beta distribution

**Supplementary Figure 1. Cost-effectiveness acceptability curve for the base-case 2% HBsAg prevalence.**

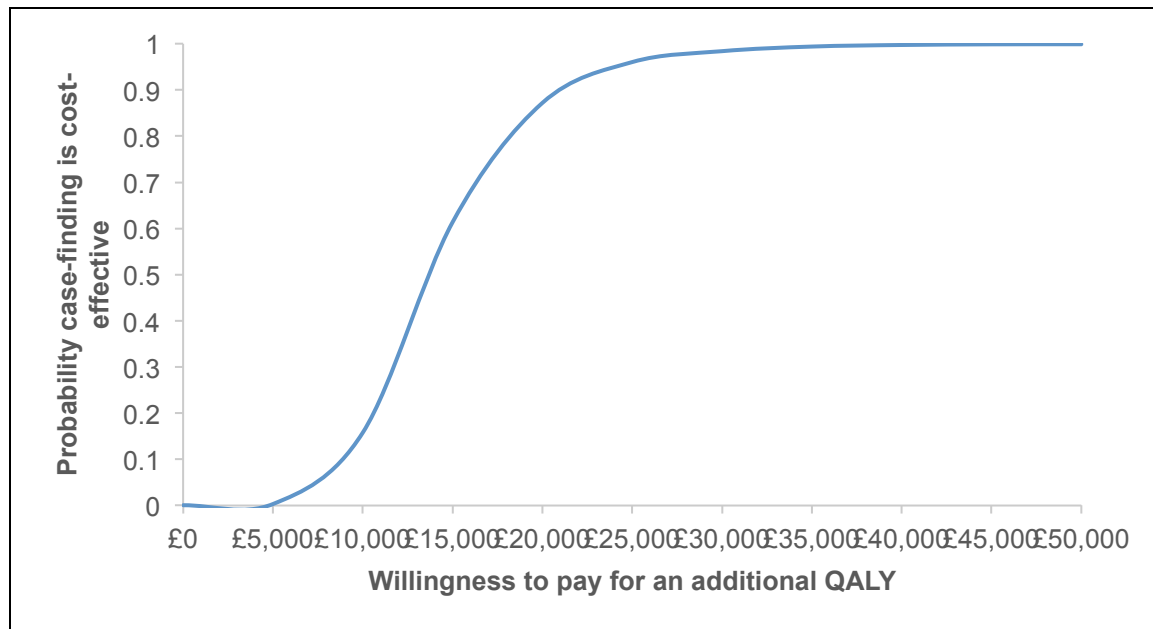

## Reference

1. Shepherd J, Jones J, Takeda A, Davidson P, Price A. Adefovir dipivoxil and pegylated interferon alfa-2a for the treatment of chronic hepatitis B: a systematic review and economic evaluation. *Health Technology Assessment*. 2006;10(28).
2. Marcellin P, Gane E, Buti M, Afdhal N, Sievert W, Jacobson IM, et al. Regression of cirrhosis during treatment with tenofovir disoproxil fumarate for chronic hepatitis B: a 5-year open-label follow-up study. *Lancet*. 2013 Feb 9;381(9865):468-75. PubMed PMID: 23234725. Epub 2012/12/14. eng.
3. Briggs A, Sculpher M, Claxton K. Decision modelling for health economic evaluation. Gray A, Briggs A, editors. Oxford: Oxford University Press; 2006.
4. Takeda A, Jones J, Shepherd J, Davidson P, Price A. A systematic review and economic evaluation of adefovir dipivoxil and pegylated interferon-alpha-2a for the treatment of chronic hepatitis B. *Journal of Viral Hepatitis*. 2007;14:75-88.
